# Supplementary material
Source: PubMed Central journal article supplement (PMC3359126)

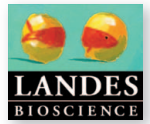

## **Supplemental Material to:**

**Varija N. Budhavarapu, Erin D. White, Christina S. Mahanic,  
Ligong Chen, Fang-Tsyr Lin and Weei-Chin Lin**

**Regulation of E2F1 by APC/CCdh1 via K11 linkage-specific  
ubiquitin chain formation**

**2012; 11(10)**

**<http://dx.doi.org/10.4161/cc.20643>**

**<http://www.landesbioscience.com/journals/cc/article/20643>**

**Figure S1. Cdh1 can directly bind to E2F2 and E2F4.**

**A.** GST, GST-E2F1 or GST-E2F2 was immobilized onto glutathione-Sepharose beads and incubated with 0.2 µg of Cdh1. Cdh1 bound to E2F1 or E2F2 was resolved by SDS-PAGE and detected by immunoblotting. The GST proteins were shown by Ponceau S staining.

**B.** GST, GST-E2F1 or GST-E2F4 was immobilized onto glutathione-Sepharose beads and then incubated with 2 µl of [ $S^{35}$ ]-labeled Cdh1. The bound [ $S^{35}$ ]-labeled Cdh1 was detected by Storm Phosphorimager. The membrane was also immunoblotted with a GST antibody to detect GST fusion proteins.

Fig. S1

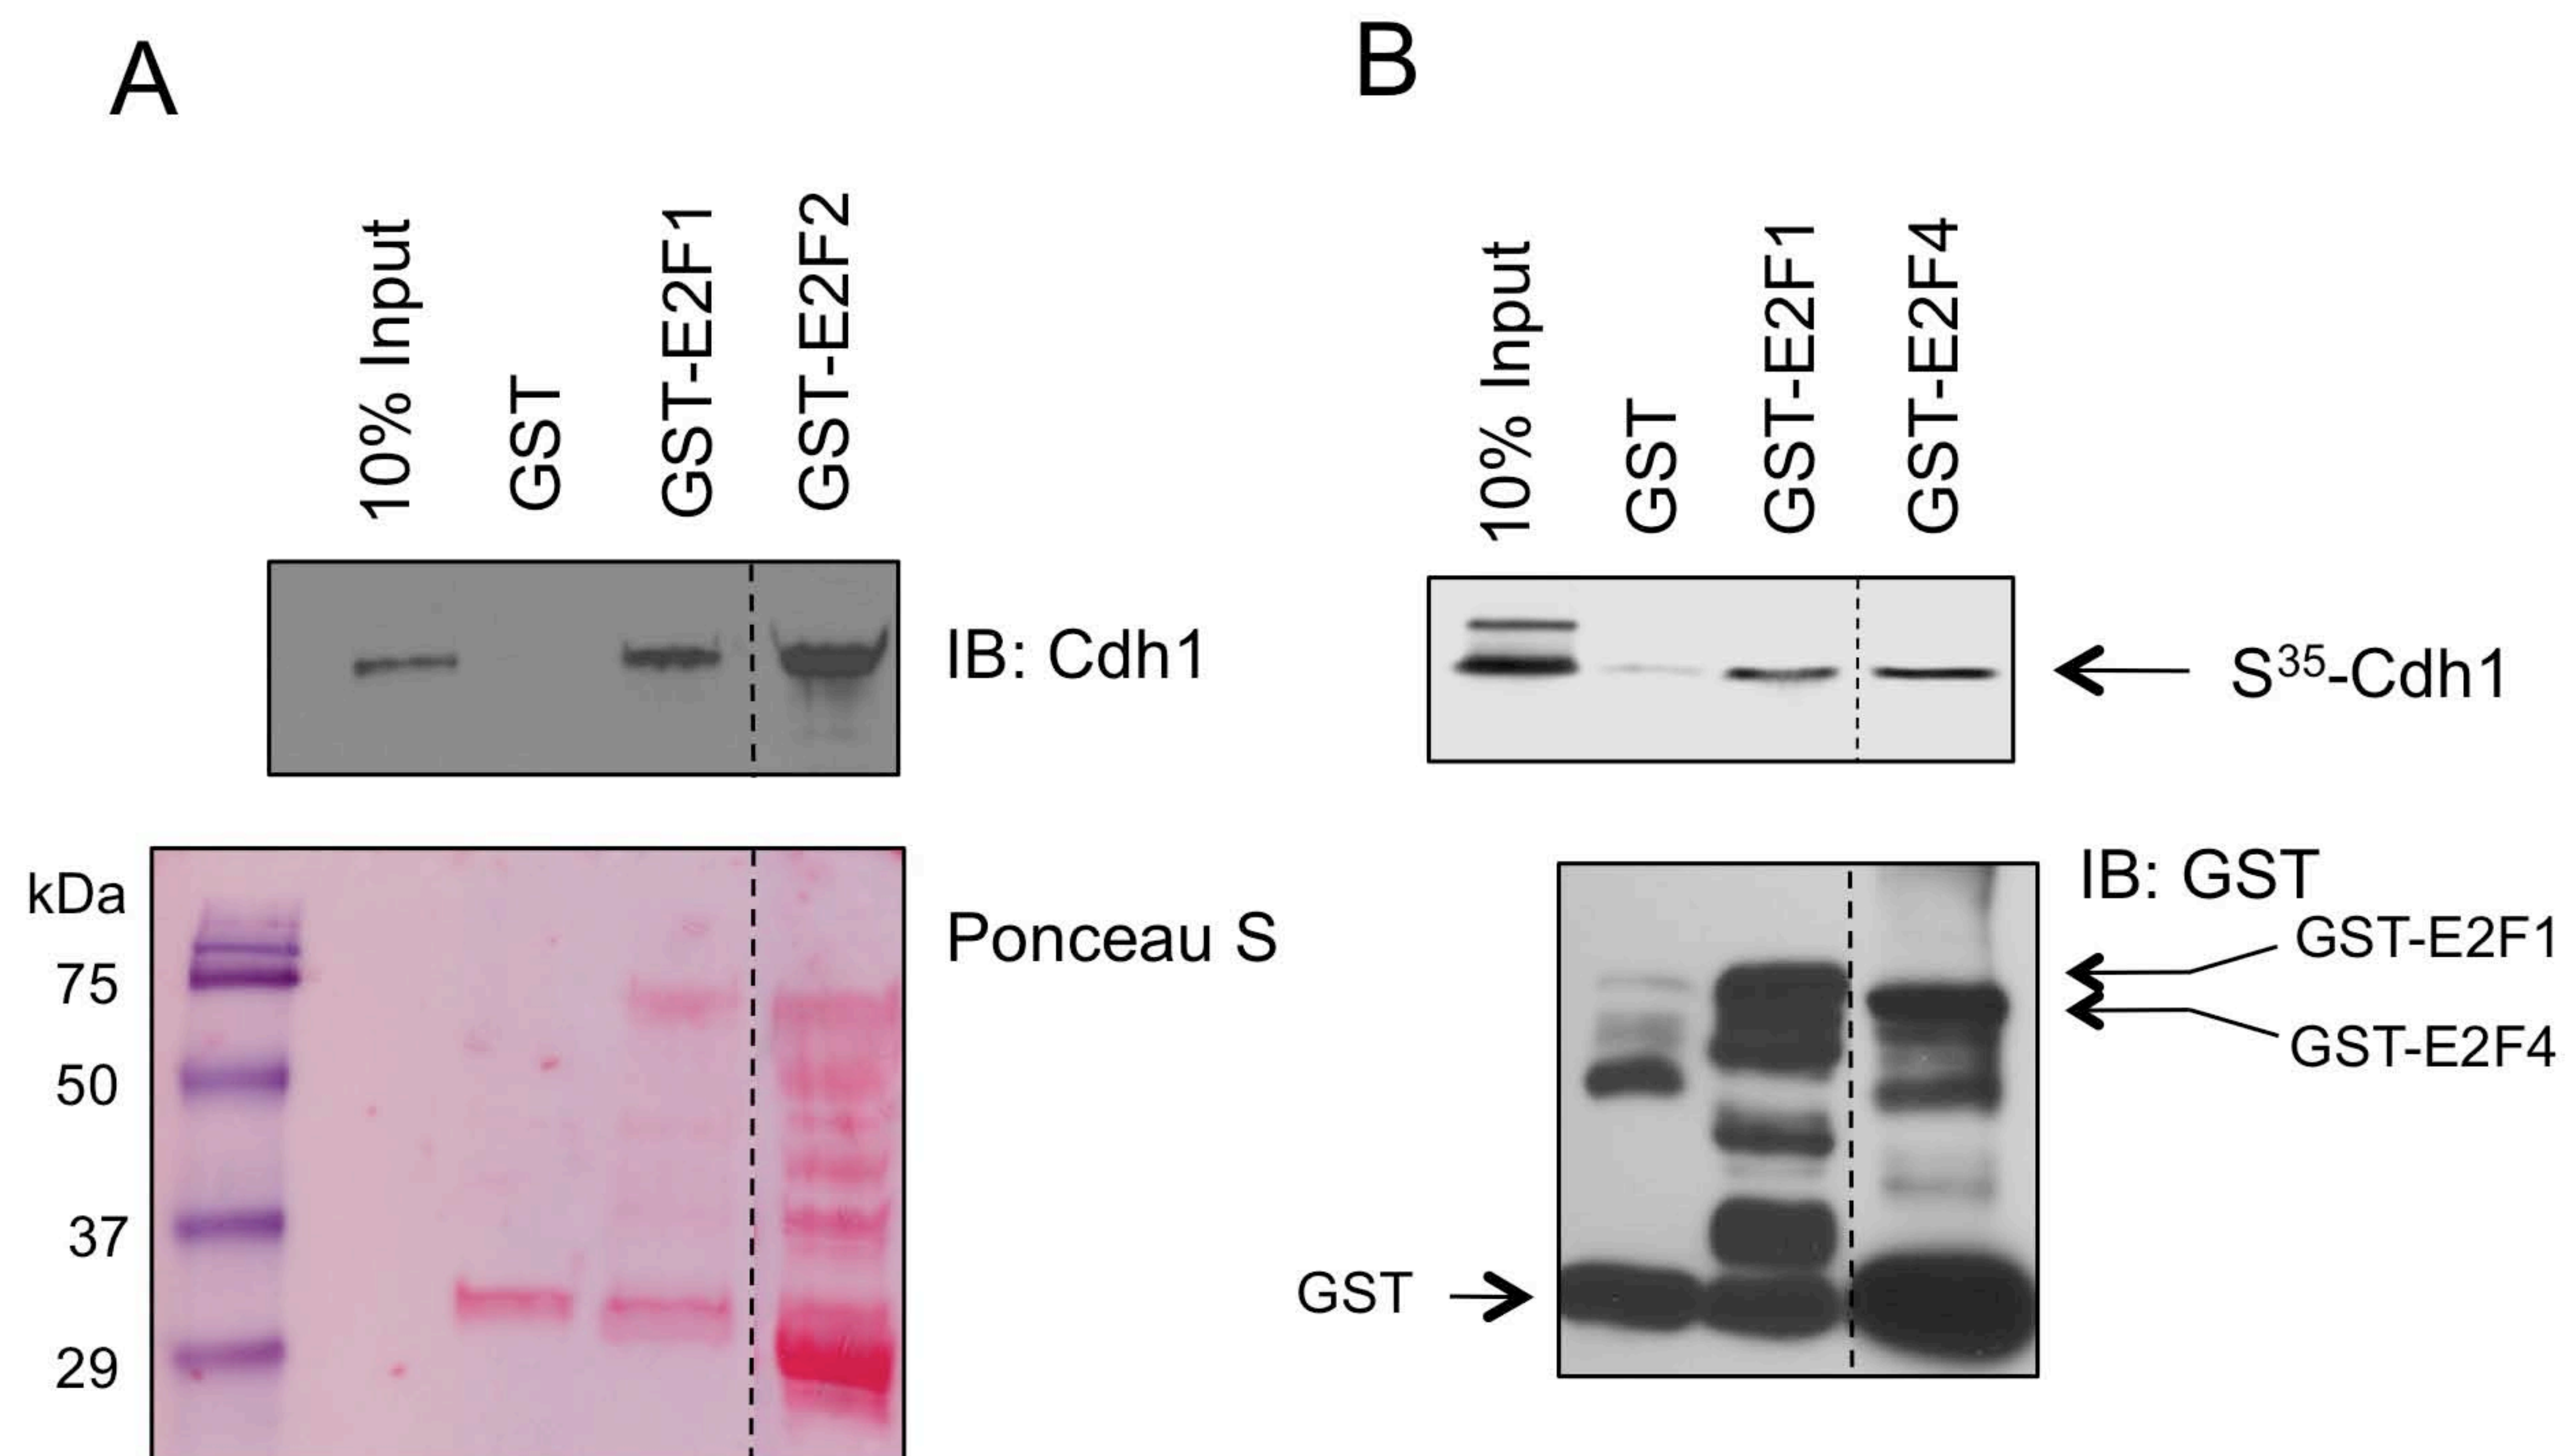

Supplement: cc-11-2030-s01.pdf [file cc-11-2030-s01.pdf]
